# Supplementary material for: Raman spectroscopy and carrier scattering in 2D tungsten disulfides with vanadium doping
Source: Royal Society of Chemistry journal article supplement (doi:10.1039/d2qm01108e), 2023-01-01
Supplement: d2qm01108e1.pdf [file d2qm01108e1.pdf]

Electronic Supplementary Material (ESI) for Materials Chemistry Frontiers.

## Raman Spectroscopy and Carrier Scattering in 2D Tungsten

### Disulfides with Vanadium Doping

Jingyun Zou,<sup>a,b\*</sup> Yingjie Xu,<sup>a</sup> Xinyue Miao,<sup>a</sup> Hongyu Chen,<sup>a</sup> Rongjie Zhang,<sup>b</sup> Junyang Tan,<sup>b</sup> Lei Tang,<sup>b</sup> Zhengyang Cai,<sup>b</sup> Cheng Zhang,<sup>a</sup> Lixing Kang,<sup>c</sup> Xiaohua Zhang,<sup>d</sup> Chunlan Ma,<sup>a\*</sup> Hui-Ming Cheng,<sup>b</sup> and Bilu Liu<sup>b\*</sup>

<sup>a</sup> Jiangsu Key Laboratory of Micro and Nano Heat Fluid Flow Technology and Energy Application, School of Physical Science and Technology, Suzhou University of Science and Technology, Suzhou 215009, China

<sup>b</sup> Shenzhen Geim Graphene Center, Tsinghua-Berkeley Shenzhen Institute & Institute of Materials Research, Tsinghua Shenzhen International Graduate School, Tsinghua University, Shenzhen 518055, China

<sup>c</sup> Division of Advanced Nano-Materials, Suzhou Institute of Nano-Tech and Nano-Bionics, Chinese Academy of Sciences, Suzhou, China

<sup>d</sup> Innovation Center for Textile Science and Technology, Donghua University, Shanghai 201620, China

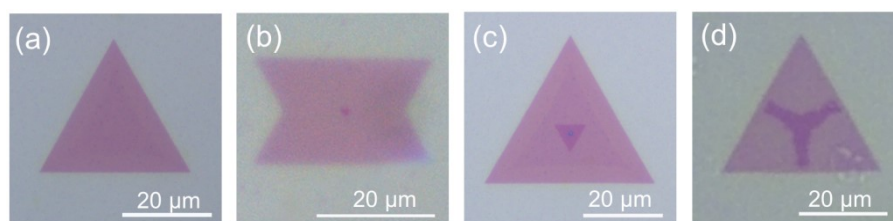

**Figure S1.** Optical microscope images of the as-grown V-WS<sub>2</sub> flakes with different morphologies. (a) A triangle monolayer, (b) a twinned monolayer V-WS<sub>2</sub>, (c) a triangle bilayer, and (d) a windmill-like bilayer flake, respectively. We find that V-WS<sub>2</sub> flakes with different morphologies and layer numbers can be grown by varying the growth parameters, including temperature and additive amount of the V precursors.

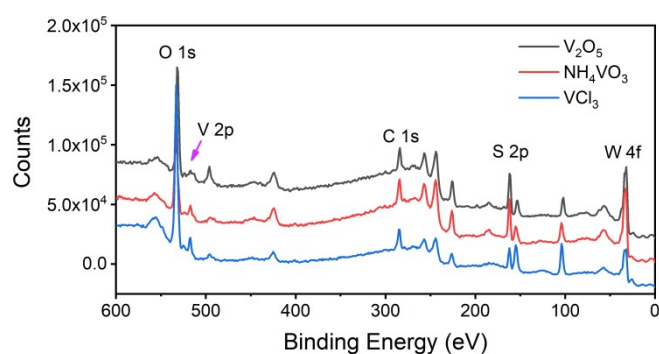

**Figure S2.** Survey XPS spectra of V-WS<sub>2</sub> flakes doped with V<sub>2</sub>O<sub>5</sub>, NH<sub>4</sub>VO<sub>3</sub>, and VCl<sub>3</sub>, respectively.

**Table S1.** Atomic concentration obtained from the XPS characterization in the V-WS<sub>2</sub> flakes

| Dopants                         | W        | S        | V        |
|---------------------------------|----------|----------|----------|
| V <sub>2</sub> O <sub>5</sub>   | 32.3 at% | 65.5 at% | 2.2 at%  |
| NH <sub>4</sub> VO <sub>3</sub> | 31.1 at% | 62.9 at% | 6.0 at%  |
| VCl <sub>3</sub>                | 29.3 at% | 59.6 at% | 11.1 at% |

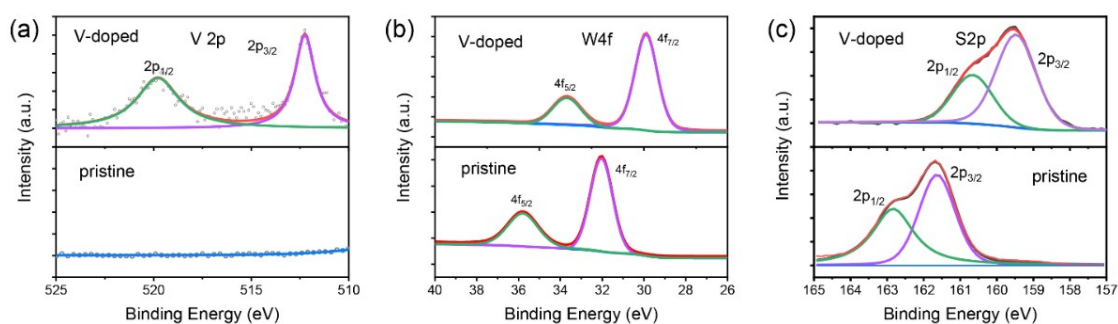

**Figure S3.** XPS analysis of V-WS<sub>2</sub> doped by VCl<sub>3</sub>. (a-c) XPS spectra of the V 2p, W 4f, and S 2p orbitals, respectively. XPS signal of vanadium is observed, confirming the existence of substituted V atoms in the V-WS<sub>2</sub> flake. Meanwhile, both the XPS peaks of W 4f and S 2p orbitals shift toward the low binding energy direction, showing the strong *p*-type doping effect.

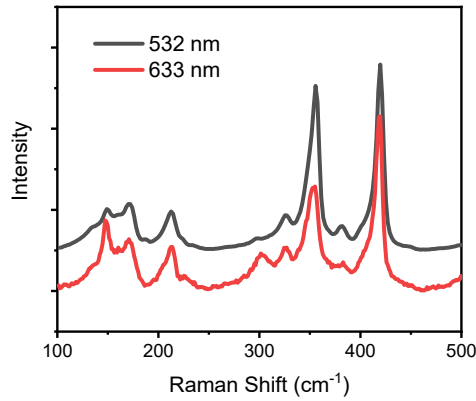

**Figure S4.** Raman spectra of the V-WS<sub>2</sub> excited by the 532-nm and 633-nm lasers. The two spectra were normalized according to the  $A_1'(I)$  peak. Obviously, though the intensity of  $E'(I)$  and  $ZA(M)$  peaks varies with the changed excitation lasers, both the peak position and intensity of  $P_c$  nearly do not change, revealing that this Raman peak has no dependence with the wavelength of the excitation lasers.

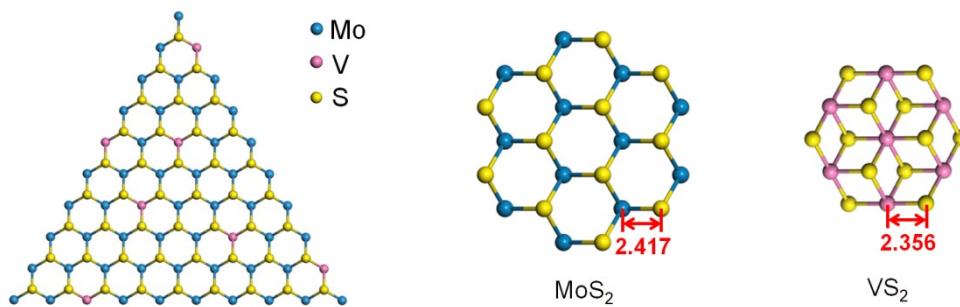

**Figure S5.** Schematics of the atomic crystal structure of (a) V-doped WS<sub>2</sub>, (b) WS<sub>2</sub>, and (c) VS<sub>2</sub>. The substituted vanadium atoms are uniformly distributed throughout the whole flake. The bond length of VS<sub>2</sub> is 2.356 Å, small than that of MoS<sub>2</sub> (2.417 Å). So, the substituted V atoms will stretch the surrounding Mo-S bonds. A tensile strain is generated in the V-WS<sub>2</sub>, which causes the shift of the Raman  $E_{2g}$  peak to the low wavenumber direction.

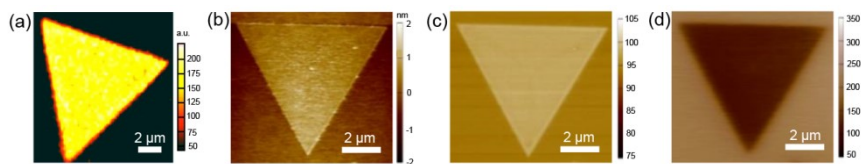

**Figure S6.** (a) Raman mapping image acquired at  $214\text{ cm}^{-1}$ , in which the uniform color profile demonstrates the uniform doping effect. (b) AFM topography image of a monolayer  $\text{V-WS}_2$  flake doped with  $\text{NH}_4\text{VO}_3$  taken at room temperature, and the corresponding (c) EFM and (d) SKPM images.

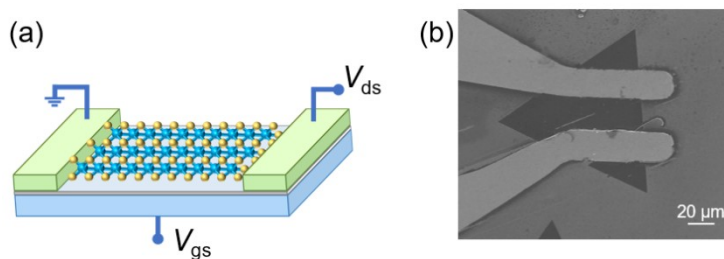

**Figure S7.** (a) Schematic and (b) SEM image of the back-gated FET with a monolayer  $\text{V-WS}_2$  flake as the channel material. The width ( $W$ ) and length ( $L$ ) of the channel are  $11.6\text{ }\mu\text{m}$  and  $36.9\text{ }\mu\text{m}$ , respectively, yielding an  $L/W$  ratio of 3.18.
